# Supplementary material for: Equivalent cation-tuning to realize a new Ce(iv) fluoride with excellent comprehensive nonlinear optical performances
Source: Royal Society of Chemistry journal article supplement (doi:10.1039/d4qi02088j), 2024-01-01
Supplement: d4qi02088j1.pdf [file d4qi02088j1.pdf]

## Supporting Information

### **Equivalent cation-tuned to realize a new Ce(IV) fluoride with excellent comprehensive nonlinear optical performances**

Bei-Bei Zhang<sup>#</sup>, Wen-Ye Gao<sup>#</sup>, Wei Xu, Liang Ma, Wenlong Liu, Ru-Ling Tang\* and Sheng-Ping Guo

*School of Chemistry and Chemical Engineering, Yangzhou University, Yangzhou, Jiangsu 225002, P. R. China*

*Corresponding author: rltang@yzu.edu.cn*

*<sup>#</sup>The authors contribute equally.*

## Supporting Information Index

### Tables and Figures

- 1) **Table S1.** Selected bond lengths ( $\text{\AA}$ ) for  $\text{NH}_4\text{Ce}_3\text{F}_{13}$ .
- 2) **Table S2.** Selected bond angles ( $^\circ$ ) for  $\text{NH}_4\text{Ce}_3\text{F}_{13}$ .
- 3) **Table S3.** Fractional atomic coordinates ( $\times 10^4$ ) and equivalent isotropic displacement parameters ( $\text{\AA}^2 \times 10^3$ ) for  $\text{NH}_4\text{Ce}_3\text{F}_{13}$ .  $U_{eq}$  is defined as 1/3 of the trace of the orthogonalized  $U_{ij}$  tensor.
- 4) **Table S4.** Hydrogen atom coordinates ( $\text{\AA} \times 10^4$ ) and isotropic displacement parameters ( $\text{\AA}^2 \times 10^3$ ) for  $\text{NH}_4\text{Ce}_3\text{F}_{13}$ .
- 5) **Table S5.** The quantitative analysis result of EDS.
- 6) **Table S6.** Inorganic monovalent cation Ce(IV)-based fluorides.
- 7) **Table S7.** Fluorides with  $\text{F}_{13}$  in the formula.
- 8) **Table S8.** The bandgaps, SHG efficiency and LIDTs of reported inorganic metal fluorides.
- 9) **Table S9.** The distortion degrees of the Ce-centered polyhedra in  $\text{NH}_4\text{Ce}_3\text{F}_{13}$ .
- 10) **Table S10.** Calculated dipole moment results of  $\text{NH}_4\text{Ce}_3\text{F}_{13}$ .
- 11) **Figure S1.** The coordination environment of Ce(1) and Ce(2) atoms in  $\text{NH}_4\text{Ce}_3\text{F}_{13}$ .
- 12) **Figure S2.** The EDS image for single-crystals of  $\text{NH}_4\text{Ce}_3\text{F}_{13}$ .
- 13) **Figure S3.** The arrangement of 1D  $\{[\text{CeF}_6]^{2-}\}_\infty$  chains and the whole structure of  $\text{Na}_2\text{CeF}_6$ .

**Table S1.** Selected bond lengths (Å) for NH<sub>4</sub>Ce<sub>3</sub>F<sub>13</sub>.

| Bond                | Length/Å | Bond                | Length/Å |
|---------------------|----------|---------------------|----------|
| Ce1-F1              | 2.237(4) | Ce2-F1 <sup>6</sup> | 2.365(3) |
| Ce1-F1 <sup>3</sup> | 2.237(3) | Ce2-F3 <sup>7</sup> | 2.417(4) |
| Ce1-F2              | 2.197(6) | Ce2-F <sup>4</sup>  | 2.616(4) |
| Ce1-F2 <sup>4</sup> | 2.301(6) | Ce2-F5              | 2.252(4) |
| Ce1-F3              | 2.356(6) | Ce2-F5 <sup>8</sup> | 2.307(4) |
| Ce1-F4              | 2.265(3) | Ce2-F6              | 2.250(3) |
| Ce1-F4 <sup>3</sup> | 2.265(3) | Ce2-F7              | 2.237(4) |
| Ce1-F7 <sup>2</sup> | 2.455(4) | Ce2-F8              | 2.317(3) |
| Ce1-F7 <sup>1</sup> | 2.455(4) | Ce2-F9              | 2.305(3) |

<sup>1</sup>1-X,1-Y,1/2+Z; <sup>2</sup>+X,1-Y,1/2+Z; <sup>3</sup>1-X,+Y,+Z; <sup>4</sup>1-X,2-Y,-1/2+Z; <sup>5</sup>-X,+Y,+Z; <sup>6</sup>1-X,-1+Y,+Z; <sup>7</sup>1-X,1-Y,-1/2+Z; <sup>8</sup>+X,1-Y,-1/2+Z

**Table S2.** Selected bond angles (°) for NH<sub>4</sub>Ce<sub>3</sub>F<sub>13</sub>.

| Atom                                 | Angle/°    | Atom                                  | Angle/°    |
|--------------------------------------|------------|---------------------------------------|------------|
| F1 <sup>3</sup> —Ce1—F1              | 87.0(2)    | F5—Ce2—F1 <sup>7</sup>                | 77.39(14)  |
| F1—Ce1—F2 <sup>4</sup>               | 71.10(14)  | F5 <sup>8</sup> —Ce2—F1 <sup>7</sup>  | 145.11(14) |
| F1 <sup>3</sup> —Ce1—F7 <sup>4</sup> | 71.10(14)  | F5—Ce2—F3 <sup>6</sup>                | 134.00(17) |
| F1—Ce1—F3                            | 130.41(12) | F5 <sup>8</sup> —Ce2—F3 <sup>6</sup>  | 73.26(17)  |
| F1 <sup>3</sup> —Ce1—F3              | 130.41(12) | F5—Ce2—F4                             | 76.93(14)  |
| F1 <sup>3</sup> —Ce1—F4              | 87.79(14)  | F5—Ce2—F5 <sup>8</sup>                | 136.20(9)  |
| F1 <sup>3</sup> —Ce1—F4 <sup>3</sup> | 141.74(13) | F5 <sup>8</sup> —Ce2—F8               | 102.64(15) |
| F1—Ce1—F4 <sup>3</sup>               | 87.79(14)  | F5—Ce2—F8                             | 79.84(16)  |
| F1—Ce1—F4                            | 141.74(13) | F5—Ce2—F9                             | 73.41(19)  |
| F1—Ce1—F7 <sup>2</sup>               | 69.42(14)  | F6—Ce2—F1 <sup>7</sup>                | 68.19(15)  |
| F1 <sup>3</sup> —Ce1—F7 <sup>1</sup> | 69.42(14)  | F6—Ce2—F3 <sup>6</sup>                | 61.22(17)  |
| F1—Ce1—F7 <sup>2</sup>               | 143.57(14) | F6—Ce2—F4                             | 72.74(14)  |
| F1—Ce1—F7 <sup>1</sup>               | 143.56(14) | F6—Ce2—F5 <sup>8</sup>                | 123.10(16) |
| F1—Ce1—F1 <sup>3</sup>               | 78.77(14)  | F6—Ce2—F5                             | 72.95(16)  |
| F2—Ce1—F1                            | 78.77(14)  | F6—Ce2—F8                             | 133.56(16) |
| F2—Ce1—F2 <sup>4</sup>               | 137.89(4)  | F6—Ce2—F9                             | 137.39(19) |
| F2 <sup>4</sup> —Ce1—F3              | 143.2(2)   | F7—Ce2—F1 <sup>7</sup>                | 71.51(15)  |
| F2—Ce1—F3                            | 78.9(2)    | F7—Ce2—F3 <sup>6</sup>                | 63.64(15)  |
| F2—Ce1—F4 <sup>4</sup>               | 136.87(12) | F7—Ce2—F4                             | 139.96(14) |
| F2—Ce1—F4                            | 136.87(12) | F7—Ce2—F5                             | 144.04(16) |
| F2 <sup>4</sup> —Ce1—F7 <sup>1</sup> | 122.51(11) | F7—Ce2—F5 <sup>8</sup>                | 73.71(15)  |
| F2—Ce1—F7 <sup>1</sup>               | 69.85(13)  | F7—Ce2—F6                             | 110.30(14) |
| F2 <sup>4</sup> —Ce1—F7 <sup>2</sup> | 122.51(11) | F7—Ce2—F8                             | 72.79(16)  |
| F2—Ce1—F7 <sup>2</sup>               | 69.85(13)  | F7—Ce2—F9                             | 112.30(17) |
| F3—Ce1—F7 <sup>1</sup>               | 61.41(11)  | F8—Ce2—F1 <sup>7</sup>                | 69.59(15)  |
| F3—Ce1—F7 <sup>2</sup>               | 61.41(11)  | F8—Ce2—F3 <sup>6</sup>                | 135.70(17) |
| F4—Ce1—F2 <sup>4</sup>               | 71.38(14)  | F9—Ce2—F1 <sup>7</sup>                | 127.42(15) |
| F4 <sup>3</sup> —Ce1—F2 <sup>4</sup> | 71.38(14)  | F9—Ce2—F3 <sup>6</sup>                | 141.8(2)   |
| F4 <sup>3</sup> —Ce1—F3              | 79.33(15)  | F9—Ce2—F5 <sup>8</sup>                | 69.54(18)  |
| F4—Ce1—F3                            | 79.33(15)  | F9—Ce2—F8                             | 62.96(17)  |
| F4—Ce1—F4 <sup>3</sup>               | 73.48(18)  | Ce1—F1—Ce2 <sup>9</sup>               | 145.7(2)   |
| F4 <sup>3</sup> —Ce1—F7 <sup>2</sup> | 127.91(13) | Ce1—F1—Ce1 <sup>10</sup>              | 166.0(3)   |
| F4—Ce1—F7 <sup>2</sup>               | 67.06(13)  | Ce1—F1—Ce2 <sup>2</sup>               | 115.53(12) |
| F4 <sup>3</sup> —Ce1—F7 <sup>1</sup> | 67.06(13)  | Ce1—F1—Ce2 <sup>1</sup>               | 115.53(12) |
| F4—Ce1—F7 <sup>1</sup>               | 127.91(13) | Ce2 <sup>1</sup> —F1—Ce2 <sup>2</sup> | 111.5(3)   |
| F7 <sup>1</sup> —Ce1—F7 <sup>2</sup> | 114.2(2)   | Ce2—F1—Ce1                            | 145.92(17) |
| F1 <sup>7</sup> —Ce2—F3 <sup>6</sup> | 88.79(16)  | Ce2—F1—Ce2 <sup>2</sup>               | 153.23(19) |
| F4—Ce2—F1 <sup>7</sup>               | 137.96(14) | Ce2 <sup>3</sup> —F1—Ce2              | 125.3(3)   |
| F4—Ce2—F3 <sup>6</sup>               | 85.72(14)  | Ce2—F1—Ce1 <sup>6</sup>               | 118.67(14) |
| F4—Ce2—F5 <sup>8</sup>               | 71.58(14)  | Ce2—F1—Ce2 <sup>5</sup>               | 115.6(2)   |
| F4—Ce2—F8                            | 136.04(15) | Ce2—F1—Ce2 <sup>5</sup>               | 116.5(2)   |

F4—Ce2—F9      74.80(15)

---

<sup>1</sup>1-X,1-Y,1/2+Z; <sup>2</sup>+X,1-Y,1/2+Z; <sup>3</sup>1-X,+Y,+Z; <sup>4</sup>1-X,2-Y,-1/2+Z; <sup>5</sup>-X,+Y,+Z; <sup>6</sup>1-X,1-Y, -1/2+Z; <sup>7</sup>1-X,-1+Y,+Z; <sup>8</sup>+X,1-Y,-1/2+Z; <sup>9</sup>1-X,1+Y,+Z; <sup>10</sup>1-X,2-Y,1/2+Z

**Table S3.** Fractional atomic coordinates ( $\times 10^4$ ) and equivalent isotropic displacement parameters ( $\text{\AA}^2 \times 10^3$ ) for  $\text{NH}_4\text{Ce}_3\text{F}_{13}$ .  $U_{eq}$  is defined as 1/3 of the trace of the orthogonalized  $U_{ij}$  tensor.

| Atom | x         | y         | z          | U(eq)    |
|------|-----------|-----------|------------|----------|
| Ce1  | 5000      | 8905.1(5) | 5570.6(7)  | 4.77(15) |
| Ce2  | 2475.7(4) | 3963.7(4) | 3953.0(10) | 4.58(13) |
| F1   | 6946(5)   | 11084(4)  | 5150(5)    | 12.5(10) |
| F2   | 5000      | 10326(8)  | 7894(7)    | 14.7(13) |
| F3   | 5000      | 6390(6)   | 7353(8)    | 10.1(11) |
| F4   | 3289(4)   | 6926(5)   | 4245(4)    | 11.8(8)  |
| F5   | 1993(5)   | 4517(6)   | 6569(5)    | 11.8(8)  |
| F6   | 5000      | 3945(6)   | 5192(6)    | 12.2(15) |
| F7   | 2396(4)   | 1800(6)   | 2048(6)    | 11.7(9)  |
| F8   | 0         | 2315(7)   | 4311(6)    | 10.5(11) |
| F9   | 0         | 625(8)    | 4089(8)    | 11.0(12) |
| N1   | 0         | 8981(13)  | 2601(15)   | 23(3)    |

**Table S4.** Hydrogen atom coordinates ( $\text{\AA} \times 10^4$ ) and isotropic displacement parameters ( $\text{\AA}^2 \times 10^3$ ) for  $\text{NH}_4\text{Ce}_3\text{F}_{13}$ .

| Atom | x       | y         | z         | U(eq)    |
|------|---------|-----------|-----------|----------|
| H1A  | 0       | 8600(200) | 3560(70)  | 100(80)  |
| H1B  | 0       | 8080(150) | 1950(150) | 170(120) |
| H1C  | 840(50) | 9680(70)  | 2430(130) | 310(130) |

**Table S5.** The quantitative analysis result of EDS.

| Compound | Molar ratio                                           |
|----------|-------------------------------------------------------|
| 1        | N : Ce : F<br>5.85 : 17.61 : 76.54 = 1 : 3.01 : 13.08 |
| 2        | N : Ce : F<br>5.76 : 17.13 : 77.11 = 1 : 2.97 : 13.39 |
| 3        | N : Ce : F<br>5.92 : 17.84 : 76.24 = 1 : 3.01 : 12.88 |

**Table S6.** Inorganic monovalent cation Ce(IV)-based fluorides.

| Compound                                                        | Space group                       | Coordination geometry | Symmetry | Dimension | Reference |
|-----------------------------------------------------------------|-----------------------------------|-----------------------|----------|-----------|-----------|
| NH <sub>4</sub> Ce <sub>3</sub> F <sub>13</sub>                 | <i>Pmc2</i> <sub>1</sub>          | CeF <sub>9</sub>      | NCS      | 3D        | This work |
| Na <sub>2</sub> CeF <sub>6</sub>                                | <i>P</i> $\bar{6}$ <i>2m</i>      | CeF <sub>9</sub>      | NCS      | 3D        | 1         |
| LiCeF <sub>5</sub>                                              | <i>I4</i> <sub>1</sub> / <i>a</i> | CeF <sub>9</sub>      | CS       | 3D        | 2         |
| Cs <sub>3</sub> CeF <sub>7</sub>                                | <i>Fm</i> $\bar{3}$ <i>m</i>      | CeF <sub>6</sub>      | CS       | 3D        | 3         |
| Rb <sub>3</sub> CeF <sub>7</sub>                                | <i>Fm</i> $\bar{3}$ <i>m</i>      | CeF <sub>6</sub>      | CS       | 3D        | 3         |
| Na <sub>3</sub> CeF <sub>7</sub>                                | <i>I4/mmm</i>                     | CeF <sub>8</sub>      | CS       | 3D        | 3         |
| CsCeF <sub>5</sub>                                              | <i>P2</i> <sub>1</sub> / <i>c</i> | CeF <sub>8</sub>      | CS       | 3D        | 4         |
| Li <sub>4</sub> CeF <sub>8</sub>                                | <i>Pnma</i>                       | CeF <sub>8</sub>      | CS       | 3D        | 5         |
| (NH <sub>4</sub> ) <sub>7</sub> Ce <sub>6</sub> F <sub>31</sub> | <i>R</i> $\bar{3}$                | CeF <sub>8</sub>      | CS       | 3D        | 6         |
| (NH <sub>4</sub> ) <sub>2</sub> CeF <sub>6</sub>                | <i>Pbcn</i>                       | CeF <sub>8</sub>      | CS       | 3D        | 7         |
| (NH <sub>4</sub> ) <sub>4</sub> CeF <sub>8</sub>                | <i>C2/c</i>                       | CeF <sub>8</sub>      | CS       | 3D        | 8         |

**Table S7.** Fluorides with F<sub>13</sub> in the formula.

| Compound                                                                                           | Space group              | Coordination geometry               | Symmetry | Dimension | Reference |
|----------------------------------------------------------------------------------------------------|--------------------------|-------------------------------------|----------|-----------|-----------|
| NH <sub>4</sub> Ce <sub>3</sub> F <sub>13</sub>                                                    | <i>Pmc2</i> <sub>1</sub> | CeF <sub>9</sub>                    | NCS      | 3D        | This work |
| KBi <sub>4</sub> F <sub>13</sub>                                                                   | <i>I</i> $\bar{4}$       | BiF <sub>3</sub>                    | NCS      | 3D        | 9         |
| NH <sub>4</sub> Sb <sub>4</sub> F <sub>13</sub>                                                    | <i>I</i> $\bar{4}$       | SbF <sub>3</sub>                    | NCS      | 3D        | 10        |
| KSb <sub>4</sub> F <sub>13</sub>                                                                   | <i>I</i> $\bar{4}$       | SbF <sub>3</sub>                    | NCS      | 3D        | 11        |
| RbU <sub>3</sub> F <sub>13</sub>                                                                   | <i>Pmc2</i> <sub>1</sub> | UF <sub>9</sub>                     | NCS      | 3D        | 12        |
| NH <sub>4</sub> UF <sub>13</sub>                                                                   | <i>Pmc2</i> <sub>1</sub> | UF <sub>9</sub>                     | NCS      | 3D        | 13        |
| RbTh <sub>3</sub> F <sub>13</sub>                                                                  | <i>Pmc2</i> <sub>1</sub> | ThF <sub>9</sub>                    | NCS      | 3D        | 14        |
| [(C <sub>5</sub> H <sub>6</sub> N <sub>2</sub> ) <sub>2</sub> H](Sb <sub>4</sub> F <sub>13</sub> ) | <i>P1</i>                | SbF <sub>4</sub> , SbF <sub>5</sub> | NCS      | 3D        | 15        |

**Table S8.** The bandgaps, SHG efficiency and LIDTs of reported inorganic metal fluorides.

| Compound                                                       | Space group                                                        | SHG efficiency ( $\times$ KDP) | LIDT ( $\times$ AGS)    | Band gap(eV) | Reference |
|----------------------------------------------------------------|--------------------------------------------------------------------|--------------------------------|-------------------------|--------------|-----------|
| BaMgF <sub>4</sub>                                             | <i>Cmc2</i> <sub>1</sub>                                           | 0.085                          | ---                     | 9.28         | 16        |
| BaZnF <sub>4</sub>                                             | <i>Cmc2</i> <sub>1</sub>                                           | 0.16                           | ---                     | 7.27         | 16        |
| Na <sub>2</sub> SbF <sub>5</sub>                               | <i>P2</i> <sub>1</sub> <i>2</i> <sub>1</sub> <i>2</i> <sub>1</sub> | 0.17                           | ---                     | 5.0          | 17        |
| CsNaTaF <sub>7</sub>                                           | <i>Cmc2</i> <sub>1</sub>                                           | 0.2                            | ---                     | 5.14         | 18        |
| Li <sub>2</sub> CaHfF <sub>8</sub>                             | $\bar{I}4$                                                         | 0.3                            | ---                     | ---          | 19        |
| Li <sub>2</sub> CaZrF <sub>8</sub>                             | $\bar{I}4$                                                         | 0.36                           | ---                     | ---          | 19        |
| KNa <sub>2</sub> ZrF <sub>7</sub>                              | <i>Pmn2</i> <sub>1</sub>                                           | 0.4                            | 50                      | 5.07         | 20        |
| K <sub>3</sub> Ba <sub>2</sub> Zr <sub>6</sub> F <sub>31</sub> | <i>P6</i> <sub>3</sub> <i>mc</i>                                   | 0.5                            | ---                     | ---          | 21        |
| KBi <sub>4</sub> F <sub>13</sub>                               | $\bar{I}4$                                                         | 0.5                            | 23.1                    | 4.24         | 10        |
| K <sub>2</sub> BaHf <sub>2</sub> F <sub>12</sub>               | <i>Imm2</i>                                                        | 0.36                           | ---                     | ---          | 22        |
| K <sub>2</sub> BaZr <sub>2</sub> F <sub>12</sub>               | <i>Imm2</i>                                                        | 0.6                            | ---                     | ---          | 22        |
| NH <sub>4</sub> Ce <sub>3</sub> F <sub>13</sub>                | <i>Pmc2</i> <sub>1</sub>                                           | 1.2                            | 39                      | 4.26         | This work |
| Na <sub>2</sub> CeF <sub>6</sub>                               | $\bar{P}6$ <sub>2</sub> <i>m</i>                                   | 2.1                            | over 20                 | 3.89         | 1         |
| NaSb <sub>3</sub> F <sub>10</sub>                              | <i>P6</i> <sub>3</sub>                                             | 3.2                            | 1.3 GM cm <sup>-2</sup> | 5.0          | 23        |
| SbF <sub>3</sub>                                               | <i>Ama2</i>                                                        | 5.8                            | ---                     | 4.3          | 24        |

**Table S9.** The distortion degrees of the Ce-centered polyhedra in NH<sub>4</sub>Ce<sub>3</sub>F<sub>13</sub>.

| compound                                        | polyhedron          | $\Delta d^a$ |
|-------------------------------------------------|---------------------|--------------|
| NH <sub>4</sub> Ce <sub>3</sub> F <sub>13</sub> | Ce(1)F <sub>9</sub> | 1.52E-03     |
|                                                 | Ce(2)F <sub>9</sub> | 5.97E-04     |

$\Delta d = \frac{1}{C} \sum [(d_n - d)/d]^2$  ( $d_n$  is the single bond length,  $d$  is the average bond length, and  $C$  is the coordination number.)

**Table S10.** Calculated dipole moment results of NH<sub>4</sub>Ce<sub>3</sub>F<sub>13</sub>.

| NO. | Unit                | Dipole moment |            |            | Magnitude Debye |
|-----|---------------------|---------------|------------|------------|-----------------|
|     |                     | x (esu cm)    | y (esu cm) | z (esu cm) |                 |
| 1   | Ce(1)F <sub>9</sub> | -0.0001       | 0.8088     | 0.7481     | 1.1017          |
| 2   | Ce(1)F <sub>9</sub> | -0.0001       | -0.8087    | 0.7483     | 1.1019          |
| 3   | Ce(2)F <sub>9</sub> | -0.4771       | 0.1648     | 0.2262     | 0.5531          |
| 4   | Ce(2)F <sub>9</sub> | 0.4770        | 0.1650     | 0.2264     | 0.5532          |
| 5   | Ce(2)F <sub>9</sub> | -0.4777       | -0.1641    | 0.2259     | 0.5533          |
| 6   | Ce(2)F <sub>9</sub> | 0.4777        | -0.1640    | 0.2261     | 0.5533          |
|     | Unit cell           | 2.2716        | -0.0004    | 0.0017     | 2.4009          |





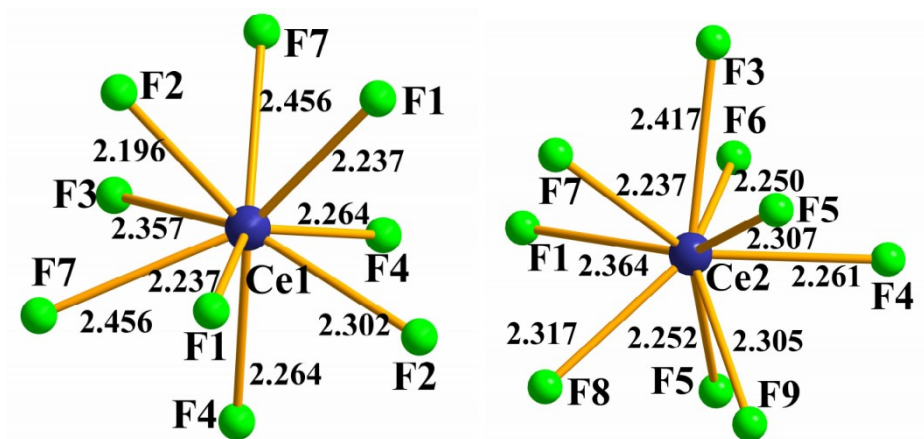

**Figure S1.** The coordination environment of Ce(1) and Ce(2) atoms in  $\text{NH}_4\text{Ce}_3\text{F}_{13}$ .

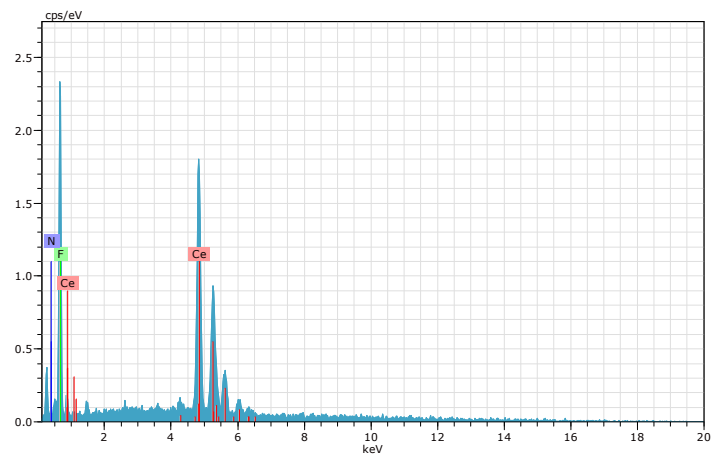

**Figure S2.** The EDS image for single-crystals of  $\text{NH}_4\text{Ce}_3\text{F}_{13}$ .

**Figure S3.** The arrangement of 1D  $\{[\text{CeF}_6]^{2-}\}_\infty$  chains and the whole structure of  $\text{Na}_2\text{CeF}_6$ .

## Reference

- 1 R. L. Tang, W. Xu, X. Lian, Y. Q. Wei, Y. L. Lv, W. L. Liu, and S. P. Guo, Na<sub>2</sub>CeF<sub>6</sub>: A Highly Laser Damage-Tolerant Double Perovskite Type Ce(IV) Fluoride Exhibiting Strong Second-Harmonic-Generation Effect, *Small*, 2024, **20**, 2308348.
- 2 A. Grzechnik, C. C. Underwood, J. W. Kolis, K. Friese, Crystal structures and stability of LiCeF<sub>5</sub> and LiThF<sub>5</sub> at high pressures: A comparative study of the coordination around the Ce<sup>4+</sup> and Th<sup>4+</sup> ions, *J. Fluor. Chem.*, 2013, **156**, 124–129.
- 3 R. Hoppe, K.M. Roedder, Fluorokomplexe des vierwertigen Cers, *Z. Anorg. Allg. Chem.*, 1961, **313**, 154–160.
- 4 A. Grzechnik, C. C. Underwood, J. W. Kolis, Twinned caesium cerium(IV) pentafluoride, *Acta Crystallogr. B.*, 2014, **70**, 112–113.
- 5 C. J. Windorff, A. T. Chemey, J. M. Sperling, B. E. Klamm, T. E. Albrecht-Schmitt, Examination of Molten Salt Reactor Relevant Elements Using Hydrothermal Synthesis, *Inorg. Chem.*, 2020, **59**, 4176–4180.
- 6 C. C. Underwood, C. D. Mcmillen, J. W. Kolis, Hydrothermal Synthesis and Crystal Chemistry of Novel Fluorides with A<sub>7</sub>B<sub>6</sub>F<sub>31</sub> (A = Na, K, NH<sub>4</sub>, Tl; B = Ce, Th) Compositions, *J. Chem. Crystallogr.*, 2014, **44**, 493–500.
- 7 R. R. Ryan, A. C. Larson, F. H. Kruse, Crystal Structure of Ammonium Hexafluorocerate(IV), (NH<sub>4</sub>)<sub>2</sub>CeF<sub>6</sub>, *Inorg. Chem.*, 1969, **8**, 33–36.
- 8 S. J. Patwe, B. N. Wani, U. R. K. Rao, and K. S. Venkateswarlu, Synthesis and thermal study of tris(ammonium) hexafluoro metallates(III) of some rare earths, *Can. J. Chem.*, 1989, **67**, 1815–1818.
- 9 Q. Wu, H. M. Liu, F. C. Jinang, X. G. Meng, X. G. Chen, L. Yang, Z. G. Hu, J. G. Qin, KBi<sub>4</sub>F<sub>13</sub>: An Infrared Nonlinear Optical Material with High Laser Damage Threshold, *Inorg. Chem.*, 2015, **31**, 1875–1880.
- 10 L. A. Zemnukhova, A. A. Udovenko, N. V. Makarenko, S. I. Kuznetsov, and T. A. Babushkina, Crystal structure and Sb NQR Parameters of ammonium tridecafluorotetraantimonate(III) NH<sub>4</sub>Sb<sub>4</sub>F<sub>13</sub>, *J. Struct. Chem.*, 2017, **58**, 694–699.
- 11 A. A. Udovenko, L. A. Zemnukhova, Y. E. Gorbunova, Y. N. Mikhailov, R. L. Davidovich, Crystal Structure of Thallium Tridecafluorotetraantimonate(III) TlSb<sub>4</sub>F<sub>13</sub>, *Russ. J. Coord. Chem.*, 2003, **29**, 310–311.
- 12 J. Yeon, M. D. Smith, J. Tapp, A. Möller and H. C. zur Loye, Mild Hydrothermal Crystal Growth, Structure, and Magnetic Properties of Ternary U(IV) Containing Fluorides: LiUF<sub>5</sub>, KU<sub>2</sub>F<sub>9</sub>, K<sub>7</sub>U<sub>6</sub>F<sub>31</sub>, RbUF<sub>5</sub>, RbU<sub>2</sub>F<sub>9</sub>, and RbU<sub>3</sub>F<sub>13</sub>, *Inorg. Chem.*, 2014, **53**, 6289–6298.
- 13 H. Abazli, A. Cousson, A. Tabuteau, M. Pages, Fluorure d'Ammonium et d'Uranium(IV): NH<sub>4</sub>U<sub>3</sub>F<sub>13</sub>, *Acta Crystallogr. B.*, 1980, **36**, 2765–2766.
- 14 C. C. Underwood, M. Mann, C. D. McMillen, and J. W. Kolis, Hydrothermal Descriptive Chemistry and Single Crystal Structure Determination of Cesium and Rubidium Thorium Fluorides, *Inorg. Chem.*, 2011, **50**, 11825–11831.
- 15 J. H. Wu, C. L. Hu, Y. F. Li, J. G. Mao, and F. Kong, [(C<sub>5</sub>H<sub>6</sub>N<sub>2</sub>)<sub>2</sub>H](Sb<sub>4</sub>F<sub>13</sub>): a polyfluoroantimonite with a strong second harmonic generation effect, *Chem. Sci.*, 2024, **15**, 8071–8079.
- 16 J. G. Bergman, G. R. Crane, H. Guggenheim, Linear and nonlinear optical properties of ferroelectric BaMgF<sub>4</sub> and BaZnF<sub>4</sub>, *J. Appl. Phys.*, 1975, **46**, 4645.
- 17 J. G. Bergman, D. S. Chemla, R. Fourcade, G. Mascherpa, Linear and nonlinear optical properties of Na<sub>2</sub>SbF<sub>5</sub>, *J. Solid State Chem.*, 1978, **23**, 187–190.
- 18 R. L. Tang, X. Lian, X. H. Li, L. Huai, W. L. Liu, and S. P. Guo, From CsKTaF<sub>7</sub> to CsNaTaF<sub>7</sub>: Alkali Metal Cations Regulation to Generate SHG Activity, *Chem. Eur. J.*, 2022, **28**, e202201588.

- 19 M. Yan, R. L. Tang, W. D. Yao, W. L. Liu and S. P. Guo, Centrosymmetric CaBaMF<sub>8</sub> and Noncentrosymmetric Li<sub>2</sub>CaMF<sub>8</sub> (M =Zr, Hf): Dimension Variation and Nonlinear Optical Activity Resulting from an Isovalent Cation Substitution-Oriented Design, *Inorg. Chem.*, 2024, **63**, 5260–5268.
- 20 X. Lian, W. D. Yao, W. L. Liu, R. L. Tang, and S. P. Guo, KNa<sub>2</sub>ZrF<sub>7</sub>: A Mixed-Metal Fluoride Exhibits Phase-Matchable Second-Harmonic-Generation Effect and High Laser-Induced Damage Threshold, *Inorg. Chem.*, 2021, **60**, 19–23.
- 21 M. Yan, R. L. Tang, W. D. Yao, W. L. Liu and S. P. Guo, Exploring a new short-wavelength nonlinear optical fluoride material featuring unprecedented polar cis-[Zr<sub>6</sub>F<sub>34</sub>]<sup>10-</sup> clusters, *Chem. Sci.*, 2024, **15**, 2883–2888.
- 22 M. Yan, R. L. Tang, W. D. Yao, W. L. Liu and S. P. Guo, From CaBaM<sub>2</sub>F<sub>12</sub> to K<sub>2</sub>BaM<sub>2</sub>F<sub>12</sub> (M = Zr, Hf): Heterovalent Cation-Substitution-Induced Symmetry Break and Nonlinear-Optical Activity, *Inorg. Chem.*, 2024, **63**, 10949–10953.
- 23 G. Zhang, J. G. Qin, T. Liu, Y. J. Li, Y. C. Wu, C. T. Chen, NaSb<sub>3</sub>F<sub>10</sub>: A new second-order nonlinear optical crystal to be used in the IR region with very high laser damage threshold, *Appl. Phys. Lett.*, 2009, **95**, 261104.
- 24 G. Zhang, T. Liu, T. X. Zhu, J. G. Qin, Y. C. Wu, C. T. Chen, SbF<sub>3</sub>: A new second-order nonlinear optical material, *Opt. Mater.*, 2008, **31**, 110–113.
